# Supplementary material for: A simple, efficient, and environmentally friendly strategy for preparing P(VDF–TrFE) with double bonds
Source: Royal Society of Chemistry journal article supplement (doi:10.1039/d4tc01674b), 2024-01-01
Supplement: d4tc01674b1.pdf [file d4tc01674b1.pdf]

## Electronic Supplementary Information

### **A simple, efficient, and environmentally friendly strategy for preparing P(VDF-TrFE) with double bonds**

Bing Hu,<sup>a,b</sup> Linping Wang,<sup>\*b</sup> Bowen Li,<sup>b,c</sup> Liang Gao,<sup>b,d</sup> Huang Lin,<sup>b,d</sup> Deng-Ren Jin<sup>\*a</sup>  
and Ben-Lin Hu<sup>\*b</sup>

*a* Institute of Materials Science, School of Materials Science and Engineering, Shanghai University, Shanghai 200072, China.

*b* CAS Key Laboratory of Magnetic Materials and Devices, and Zhejiang Province Key Laboratory of Magnetic Materials and Application Technology, Ningbo Institute of Materials Technology and Engineering, Chinese Academy of Sciences, Ningbo 315201, China.

*c* Faculty of Chemical Engineering, Kunming University of Science and Technology, Kunming 650500, China.

*d* Nano Science and Technology Institute, University of Science and Technology of China, Suzhou 215123, China.

\*Correspondence to:

[wanglinping@nimte.ac.cn](mailto:wanglinping@nimte.ac.cn); [drjin@shu.edu.cn](mailto:drjin@shu.edu.cn); [hubenlin@nimte.ac.cn](mailto:hubenlin@nimte.ac.cn)

## 1 **Experimental section**

### 2 **Material**

3 The copolymer P(VDF-TrFE) 70/30 mol% was obtained from Arkema  
4 Piezotech. Sodium hydroxide and acetone were obtained from National  
5 Medicines Group Chemical Reagent Co., Ltd. Hexane, *N,N*-dimethylformamide  
6 (DMF), dimethyl sulfoxide (DMSO) and *N*-methyl-2-pyrrolidone (NMP) were  
7 obtained from Aladdin.

### 8 **Synthesis of Unsaturated P(VDF-TrFE)**

9 A series of P(VDF-TrFE-DB) copolymers were directly synthesized from  
10 P(VDF-TrFE) and NaOH under diverse conditions, including variations in  
11 solvent type, reaction temperature, reaction time, alkaline amount, and solution  
12 concentrations, as outlined in **Table S3**. For instance, entry 3 was selected as an  
13 example. In a 25 mL round-bottom flask, 200 mg of P(VDF-TrFE) 70/30 and 4  
14 mL of DMF were added and stirred at 70 °C until complete dissolution.  
15 Subsequently, 100 mg of solid NaOH was dissolved in 0.2 mL of deionized  
16 water, and then diluted with 1 mL of DMF. The diluted NaOH solution was then  
17 dropwise added to the P(VDF-TrFE) solution, and the mixtures were heated to  
18 70 °C for 4 h. The reaction was halted upon reaching the designated reaction  
19 time, and the mixture was subsequently cooled to room temperature. The reaction  
20 mixture was precipitated in deionized water. The crude product was dissolved in  
21 acetone and precipitated in hexane. After three washes with hexane, the product  
22 was dried overnight in a vacuum oven at 60 °C, yielding brownish solid  
23 agglomerates.

### 24 **Preparation of rigid device for ferroelectric response test**

25 A solution consisting of 100 mg P(VDF-TrFE-DB) in 2 mL cyclohexanone  
26 was prepared. This solution was deposited onto an Au(111)/Ti/SiO<sub>2</sub>/Si wafer (10  
27 mm × 10 mm) using spin-coating at 500 rpm for 5 s and 2500 rpm for 35 s to  
28 achieve a uniform film. Subsequently, the film was naturally dried in a  
29 ventilation cabinet for 24 hours and then subjected to vacuum oven treatment at  
30 60 °C for 8 hours. This process yielded a film with a thickness of approximately  
31 250 nm. Finally, a gold (Au) electrode with a diameter of 200 μm and thickness  
32 of 100 nm was deposited via magnetron sputtering to create the Au/P(VDF-  
33 TrFE-DB)/Au/Ti/SiO<sub>2</sub>/Si structure. *P*-*E* loops at room temperature were  
34 acquired using a Premiere II ferroelectric tester from Radiant Technologies, Inc.,  
35 USA.

### 36 **Characterization**

$^1\text{H}$  NMR spectra were recorded using a Bruker (Advance III) 600 MHz spectrometer with acetone- $d_6$  as the solvent and tetramethylsilane as an internal standard. The chemical structures were determined via the FTIR and X-ray Photoelectron Spectroscopy (XPS) spectra. FTIR spectra were obtained using an Agilent CARY 660 FTIR spectrometer, and the XPS spectrums were acquired using a Kratos AXIS SUPRA X-ray photoelectron spectrometer with a monochromatic Al Ka source.

### Calculation of Double Bond Content in P(VDF-TrFE-DB)

The content of VDF can be represented by the sum of the unreacted VDF content “ $a/2$ ”, the content of  $-\text{CF}=\text{CH}-$  “ $b$ ”, and the content of  $-\text{CH}=\text{CH}-$  “ $c/2$ ”, i.e.,  $(a/2 + b + c/2)$ . Similarly, the content of TrFE can be represented by the sum of the unreacted TrFE content “ $1$ ”, the content of  $-\text{CH}=\text{CH}-$  “ $c/2$ ”, and the content of  $-\text{CF}=\text{CF}-$  “ $x$ ”, i.e.,  $(x + 1 + c/2)$ . This relationship, with a VDF to TrFE ratio of 68.43:31.57, calculated based on the  $^1\text{H}$  NMR (Fig. S5), is mathematically expressed by equation (1). The content of all double bonds in the reaction product can be represented as  $(x + c/2 + b)$ , and the content of all chemical structures can be represented as  $(a/2 + 1 + b + c/2 + x)$ . Therefore, the double bond content can be expressed by equation (2). By combining equations (1) and (2), the total double bond content in the product can be calculated.

$$\frac{31.57}{68.43} = \frac{x + 1 + \frac{c}{2}}{\frac{a}{2} + b + \frac{c}{2}} \# (1)$$

$$\text{Content(DB)} = \frac{x + b + \frac{c}{2}}{\frac{a}{2} + 1 + x + b + \frac{c}{2}} = \frac{31.57a + 200b + 31.57c - 136.86}{100a + 200b + 31.57c} \# (2)$$

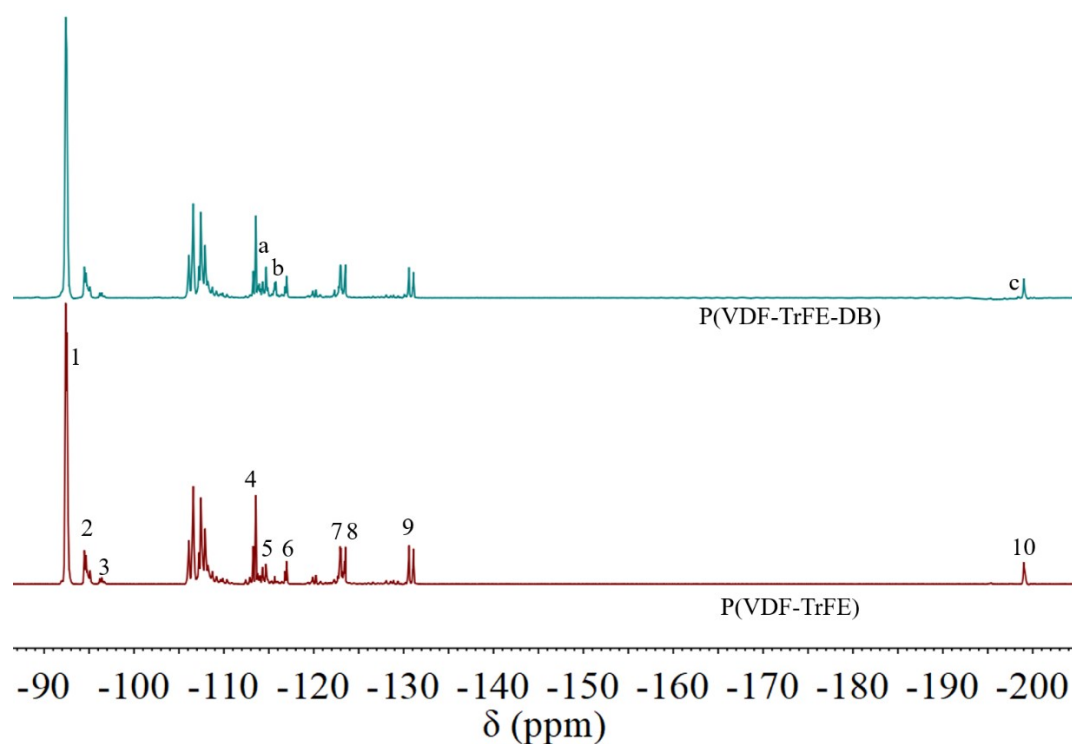

**Fig. S1**  $^{19}\text{F}$  NMR spectra of P(VDF-TrFE) and P(VDF-TrFE-DB), with detailed chemical structures denoted by corresponding numbers and characters, as illustrated in **Table S1**.

**Table S1**  $^{19}\text{F}$  NMR chemical shifts and assignments of P(VDF-TrFE-DB)s and P(VDF-TrFE-DB)s

| Signal | Chemical composition                                        | Chemical shift/ppm |
|--------|-------------------------------------------------------------|--------------------|
| 1      | $-\text{CF}_2\text{CH}_2\text{CF}_2\text{CH}_2\text{CF}_2-$ | -92.4              |
| 2      | $-\text{CHFCH}_2\text{CF}_2\text{CH}_2\text{CF}_2-$         | -94.4 to -95.0     |
| 3      | $-\text{CH}_2\text{CH}_2\text{CF}_2\text{CH}_2\text{CF}_2-$ | -95.0 to -96.5     |
| 4-6    | $-\text{CHF}\text{CF}_2\text{CF}_2\text{CH}_2\text{CF}_2-$  | -112.0 to -117.0   |
| a      | $\text{CH}=\text{CF}$                                       | -113.9             |
| b      | $\text{CF}=\text{CF}$                                       | -115.8             |
| 7-8    | $-\text{CH}_2\text{CHF}\text{CF}_2\text{CHF}\text{CF}-$     | -123.0             |
| 9      | $-\text{CH}_2\text{CF}_2\text{CF}_2\text{CHFCH}_2-$         | -130.3             |
| c      | $-\text{CFHCF}_2\text{CF}_2\text{CH}=\text{CHCF}_2-$        | -198.4             |
| 10     | $-\text{CF}_2\text{CF}_2\text{CHFCH}_2\text{CF}_2-$         | -199.0             |

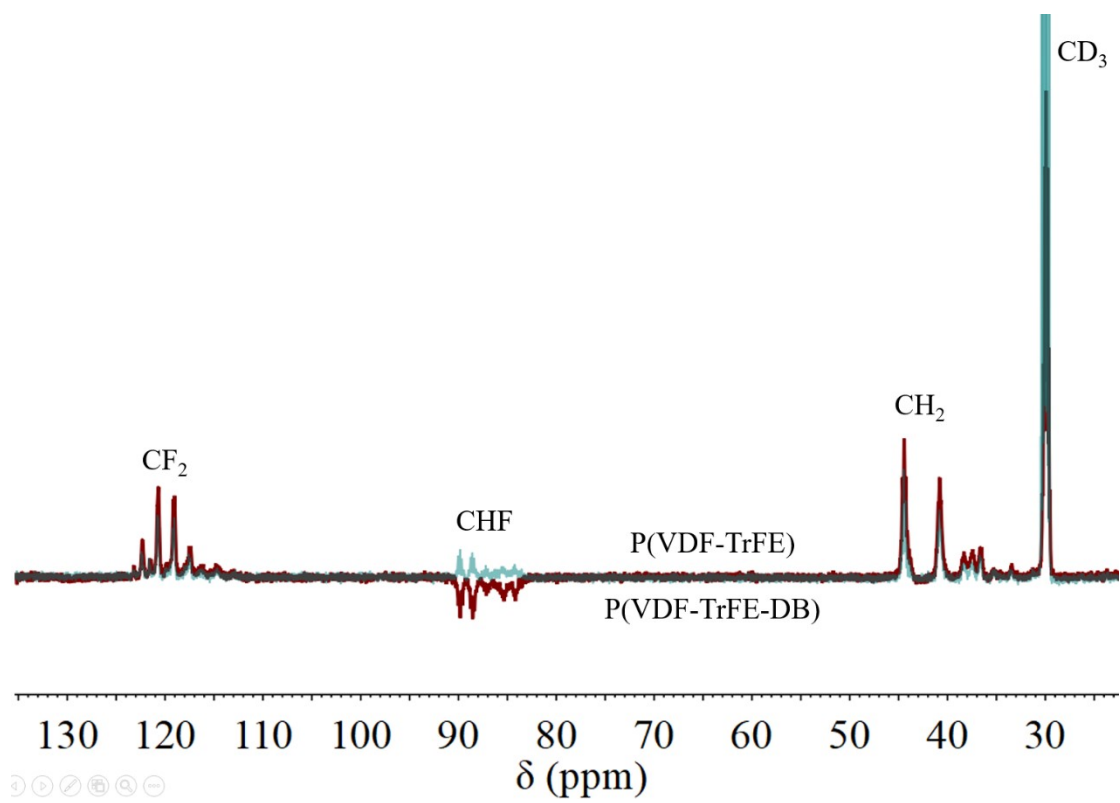

**Fig. S2**  $^{13}\text{C}$  NMR spectra of P(VDF-TrFE) and P(VDF-TrFE-DB)s

A series of P(VDF-TrFE-DB) copolymers were directly synthesized from P(VDF-TrFE) under various conditions, as detailed in **Table S2**. The chemical composition of the resulting P(VDF-TrFE-DB) was identified through <sup>1</sup>H NMR analysis, and the <sup>1</sup>H NMR spectra for all reactions are shown in **Fig. S3-S18**.

**Table S2** Chemical compositions of P(VDF-TrFE-DB)s synthesized under various reaction conditions

| Entry | Temperature (°C) | Time (h) | Solvent (mL) | P(VDF-TrFE) (mg) | NaOH (mg) | Double Bonds (%) | Yield (%) |
|-------|------------------|----------|--------------|------------------|-----------|------------------|-----------|
| 1     | 70               | 4        | DMSO (5)     | 200              | 100       | 0.92             | 35.06     |
| 2     | 70               | 4        | NMP (5)      | 200              | 100       | 1.97             | 9.13      |
| 3     | 70               | 4        | DMF (5)      | 200              | 100       | 5.68             | 64.17     |
| 4     | 70               | 0.25     | DMF (5)      | 200              | 100       | 1.85             | 66.97     |
| 5     | 70               | 1        | DMF (5)      | 200              | 100       | 4.64             | 64.29     |
| 6     | 70               | 12       | DMF (5)      | 200              | 100       | 5.74             | 50.90     |
| 7     | 70               | 24       | DMF (5)      | 200              | 100       | 7.01             | 28.73     |
| 8     | 50               | 4        | DMF (5)      | 200              | 100       | 2.22             | 66.22     |
| 9     | 90               | 4        | DMF (5)      | 200              | 100       | 6.97             | 24.87     |
| 10    | 110              | 4        | DMF (5)      | 200              | 100       | 8.69             | 15.09     |
| 11    | 70               | 4        | DMF (5)      | 200              | 50        | 2.56             | 67.08     |
| 12    | 70               | 4        | DMF (5)      | 200              | 75        | 3.84             | 64.82     |
| 13    | 70               | 4        | DMF (5)      | 200              | 125       | 7.06             | 46.81     |
| 14    | 70               | 4        | DMF (3.3)    | 200              | 100       | 5.47             | 57.43     |
| 15    | 70               | 4        | DMF (2.5)    | 200              | 100       | 4.59             | 64.26     |
| 16    | 70               | 4        | DMF (2)      | 200              | 100       | 4.49             | 55.06     |

\*Yield =  $m_p/m_r$ , where  $m_p$  represents the mass of the resulting P(VDF-TrFE-DB) product, and  $m_r$  denotes the mass of the raw material P(VDF-TrFE).

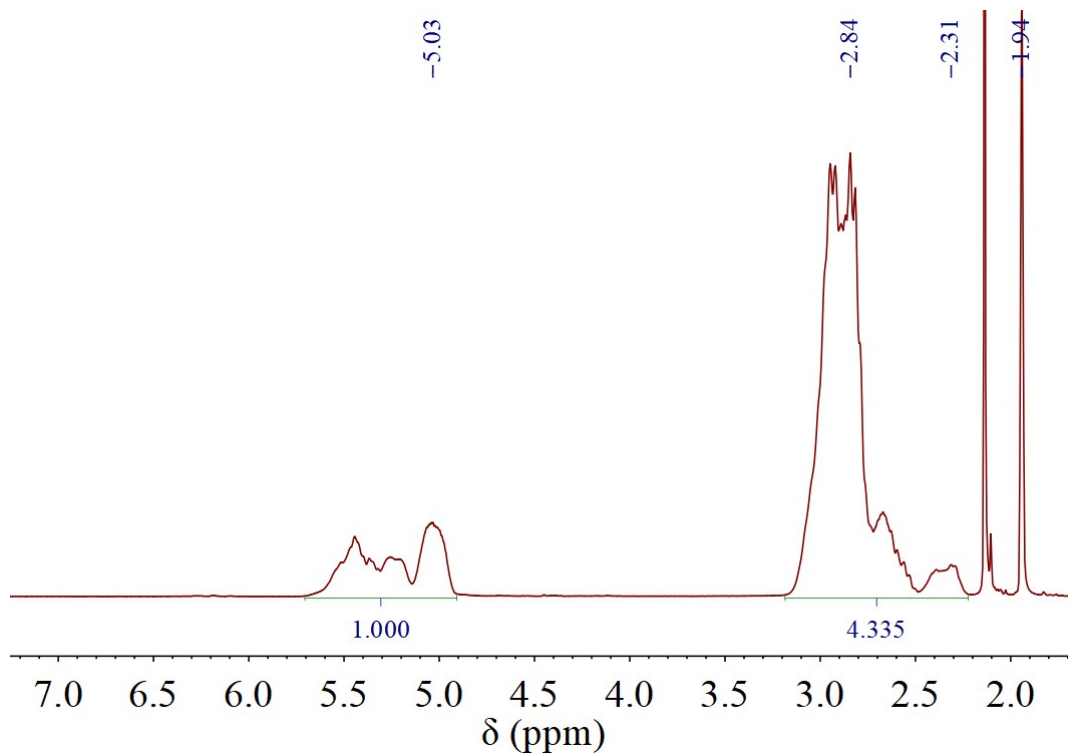

**Fig. S3**  $^1\text{H}$  NMR spectrum of pristine P(VDF-TrFE) 70/30 mol%. (The calculated VDF to TrFE ratio was 68.43:31.57)

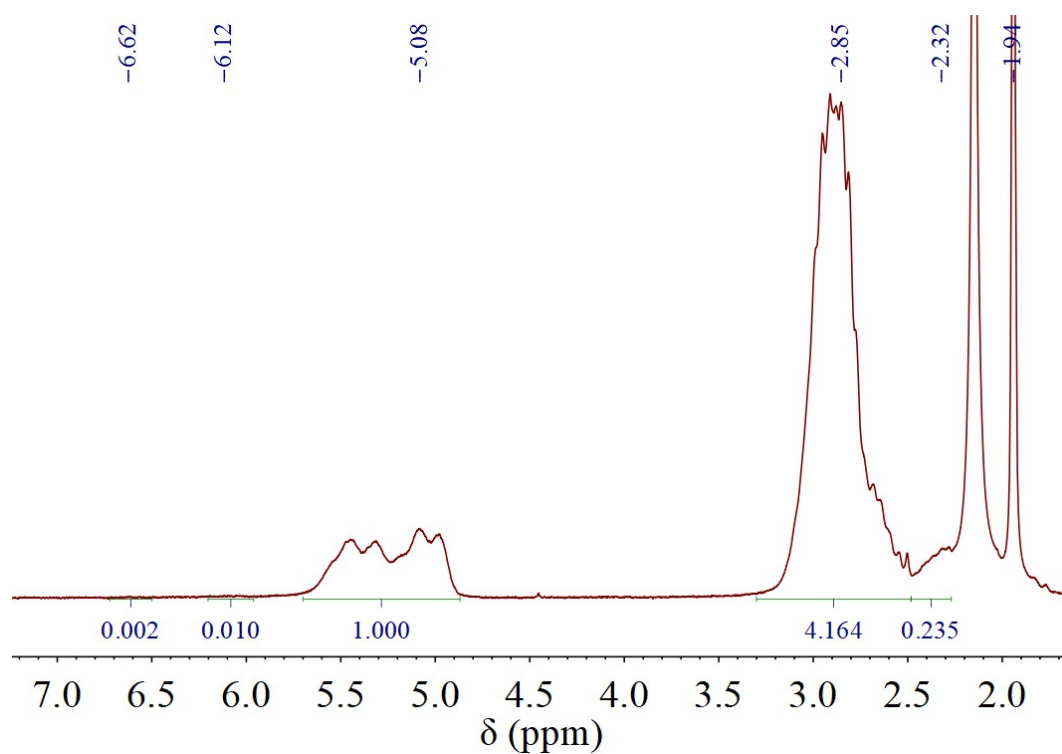

**Fig. S4**  $^1\text{H}$  NMR spectrum of the P(VDF-TrFE-DB) as synthesized from the reaction as depicted in entry 1 of **Table S3**

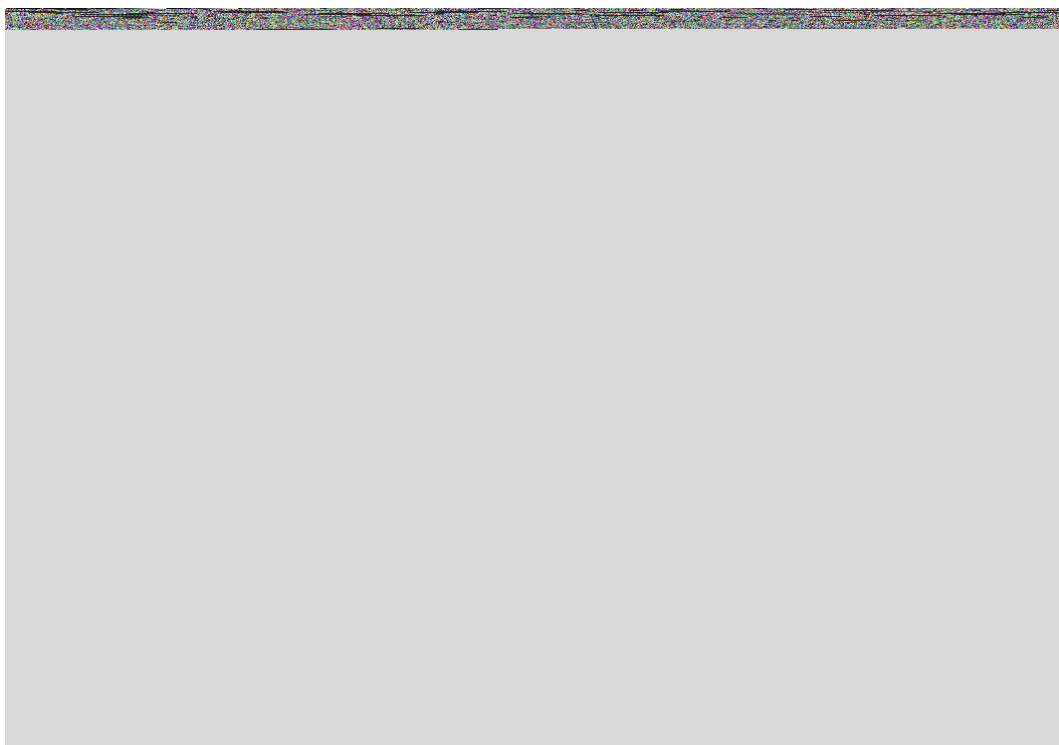

**Fig. S5**  $^1\text{H}$  NMR spectrum of P(VDF-TrFE-DB) as synthesized from the reaction as depicted in entry 2 of **Table S3**



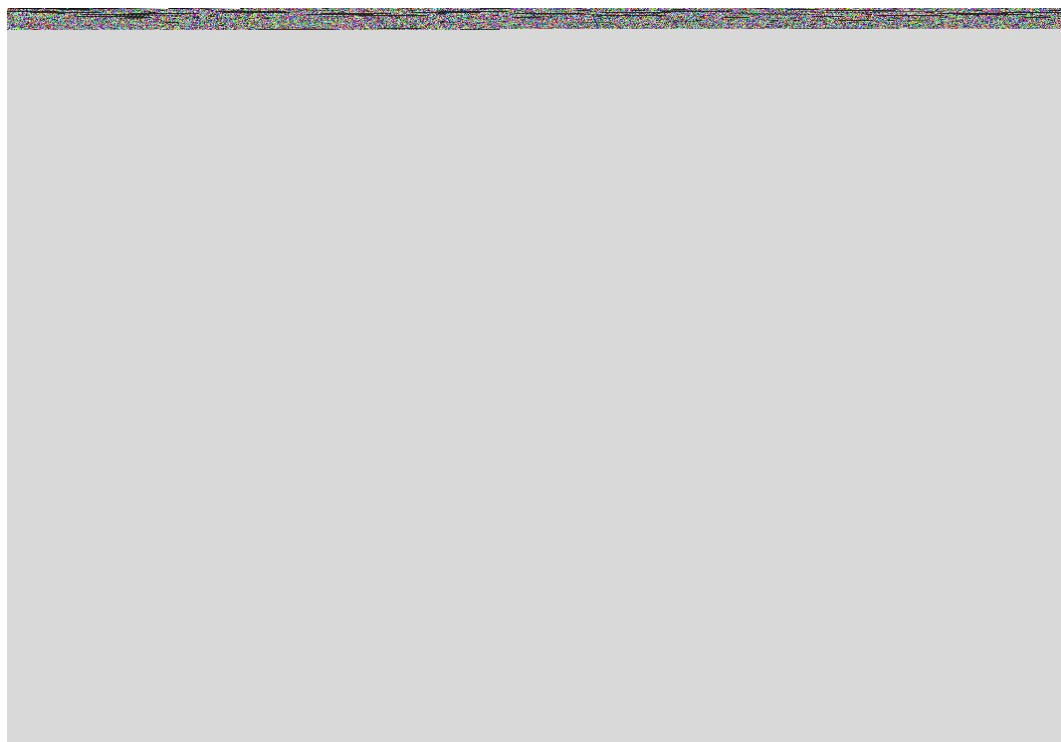

**Fig. S6**  $^1\text{H}$  NMR spectrum of P(VDF-TrFE-DB) as synthesized from the reaction as depicted in entry 3 of **Table S3**

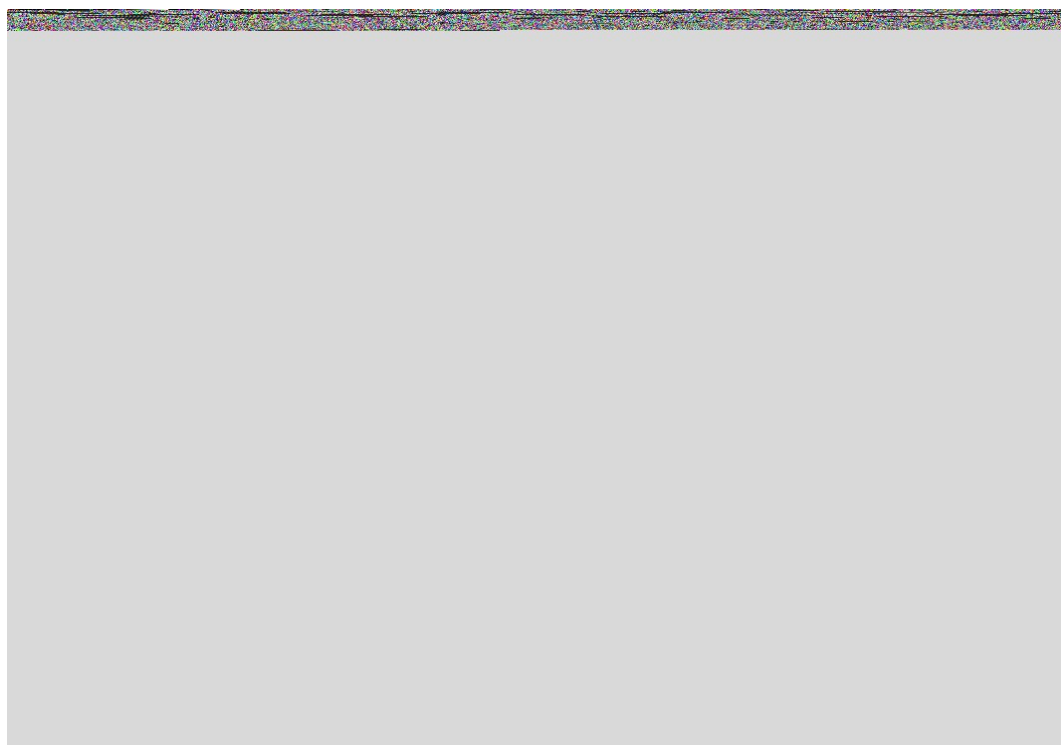

**Fig. S7**  $^1\text{H}$  NMR spectrum of P(VDF-TrFE-DB) as synthesized from the reaction as depicted in entry 4 of **Table S3**

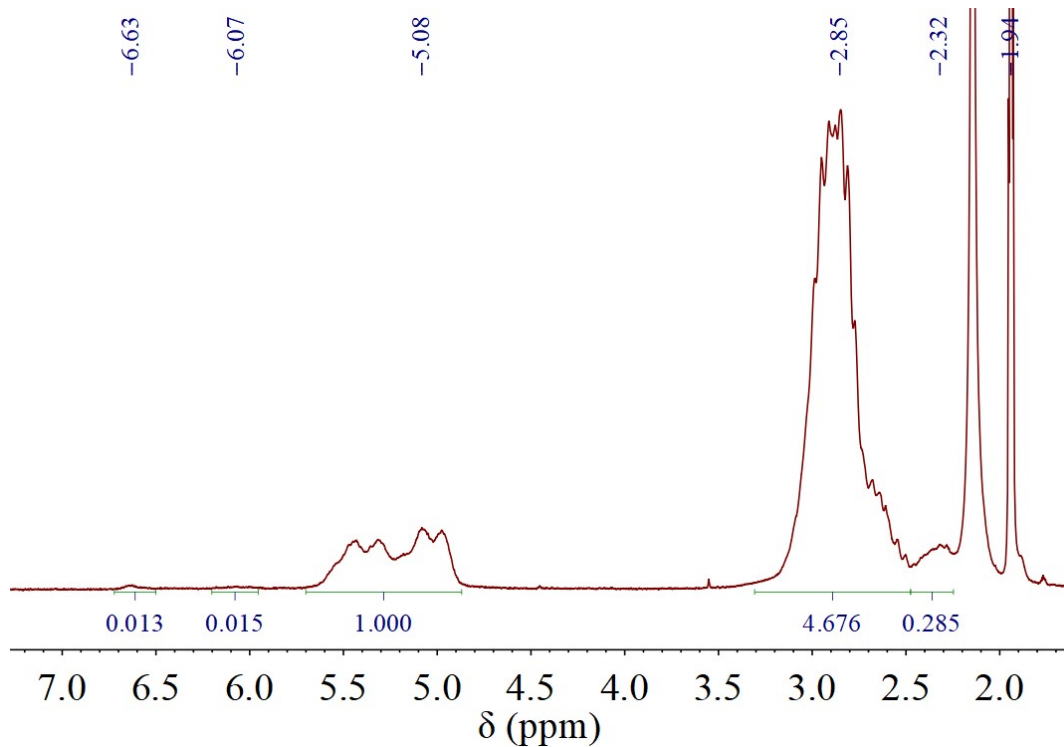

**Fig. S8**  $^1\text{H}$  NMR spectrum of P(VDF-TrFE-DB) as synthesized from the reaction as depicted in entry 5 of **Table S3**

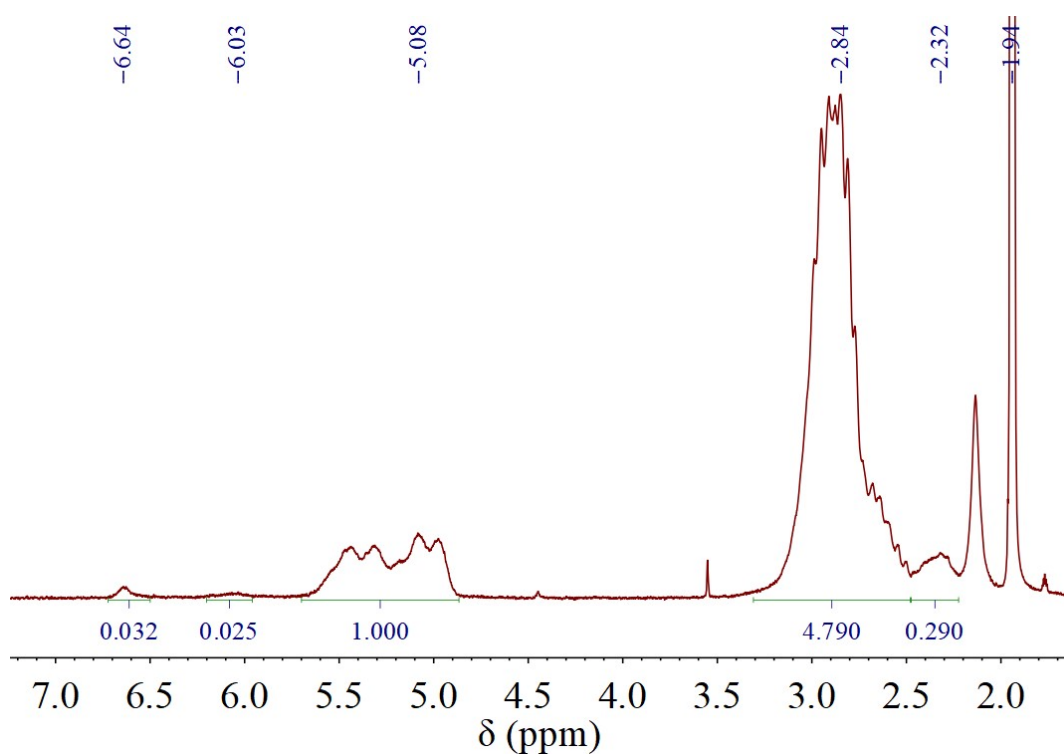

**Fig. S9**  $^1\text{H}$  NMR spectrum of P(VDF-TrFE-DB) as synthesized from the reaction as depicted in entry 6 of **Table S3**

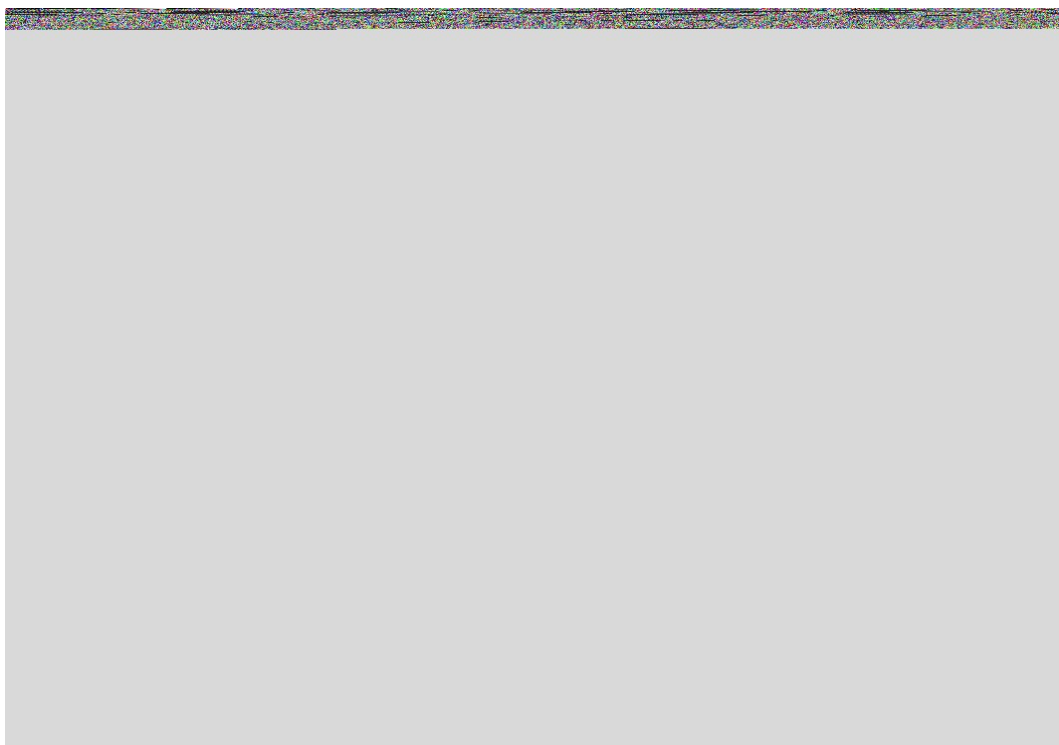

**Fig. S10**  $^1\text{H}$  NMR spectrum of P(VDF-TrFE-DB) as synthesized from the reaction as depicted in entry 7 of **Table S3**

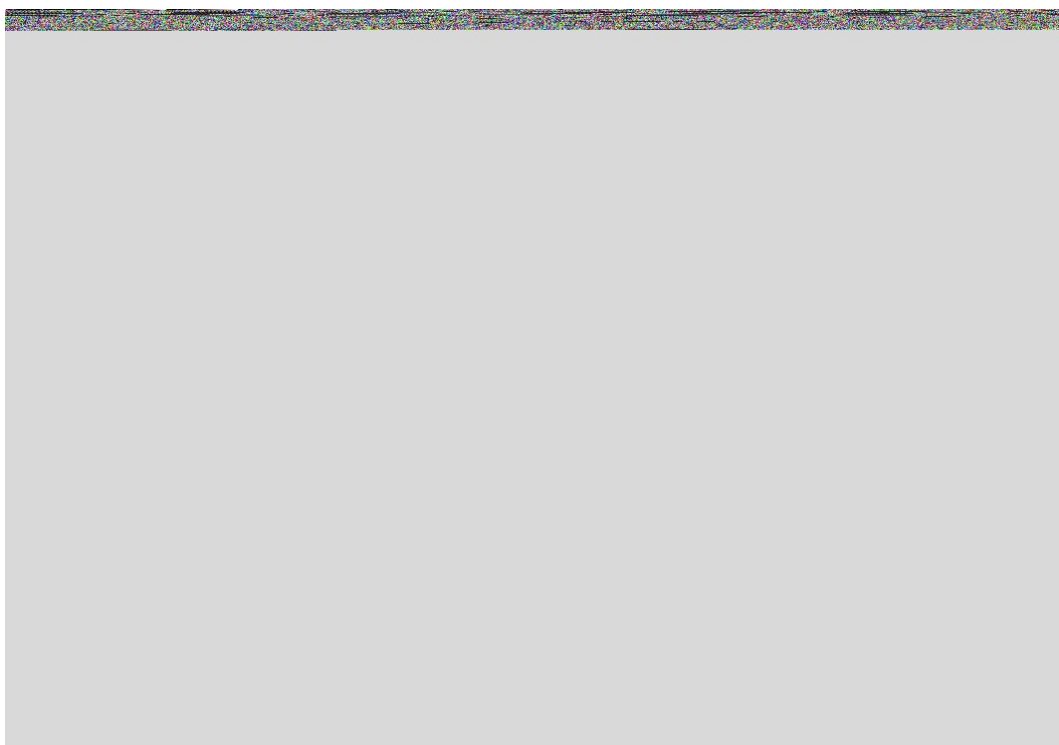

**Fig. S11**  $^1\text{H}$  NMR spectrum of P(VDF-TrFE-DB) as synthesized from the reaction as depicted in entry 8 of **Table S3**



**Fig. S12**  $^1\text{H}$  NMR spectrum of P(VDF-TrFE-DB) as synthesized from the reaction as depicted in entry 9 of **Table S3**



**Fig. S13**  $^1\text{H}$  NMR spectrum of P(VDF-TrFE-DB) as synthesized from the reaction as depicted in entry 10 of **Table S3**



**Fig. S14**  $^1\text{H}$  NMR spectrum of P(VDF-TrFE-DB) as synthesized from the reaction as depicted in entry 11 of **Table S3**



**Fig. S15**  $^1\text{H}$  NMR spectrum of P(VDF-TrFE-DB) as synthesized from the reaction as depicted in entry 12 of **Table S3**

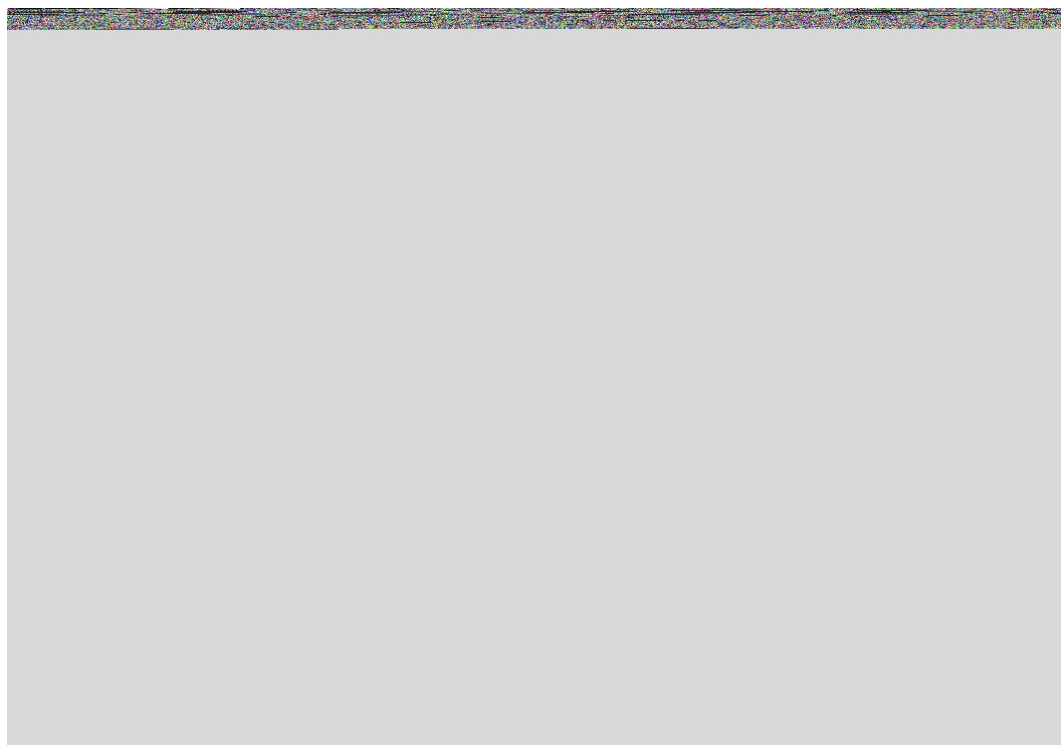

**Fig. S16**  $^1\text{H}$  NMR spectrum of P(VDF-TrFE-DB) as synthesized from the reaction as depicted in entry 13 of **Table S3**

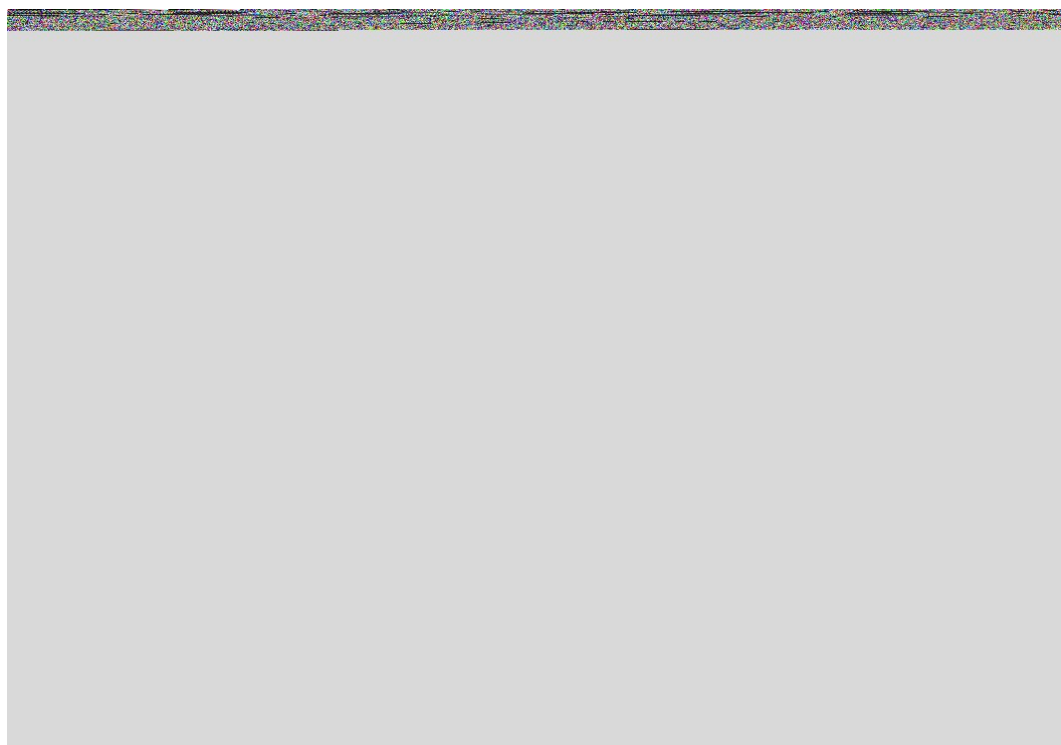

**Fig. S17**  $^1\text{H}$  NMR spectrum of P(VDF-TrFE-DB) as synthesized from the reaction as depicted in entry 14 of **Table S3**

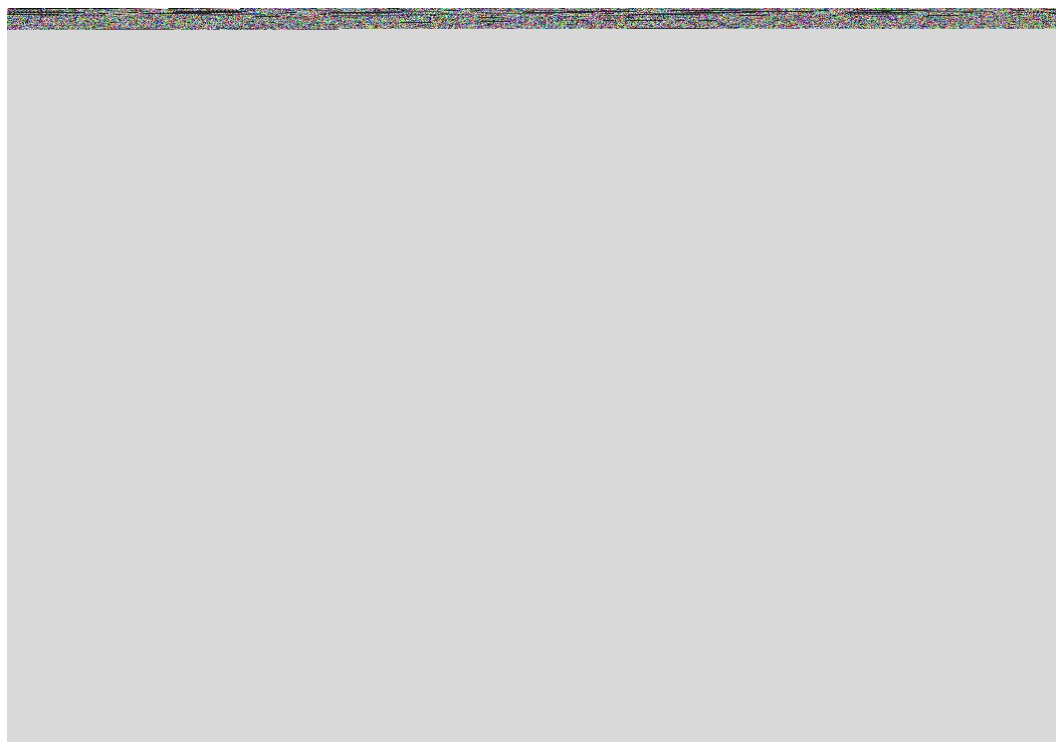

**Fig. S18**  $^1\text{H}$  NMR spectrum of P(VDF-TrFE-DB) as synthesized from the reaction as depicted in entry 15 of **Table S3**

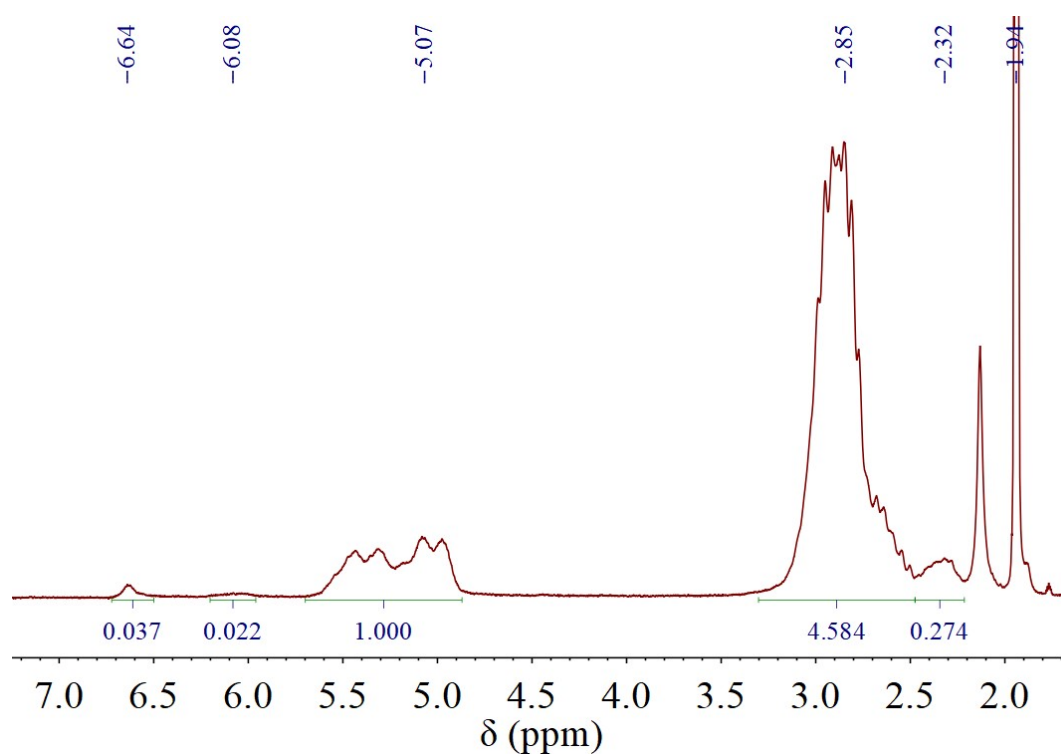

**Fig. S19**  $^1\text{H}$  NMR spectrum of P(VDF-TrFE-DB) as synthesized from the reaction as depicted in entry 16 of **Table S3**

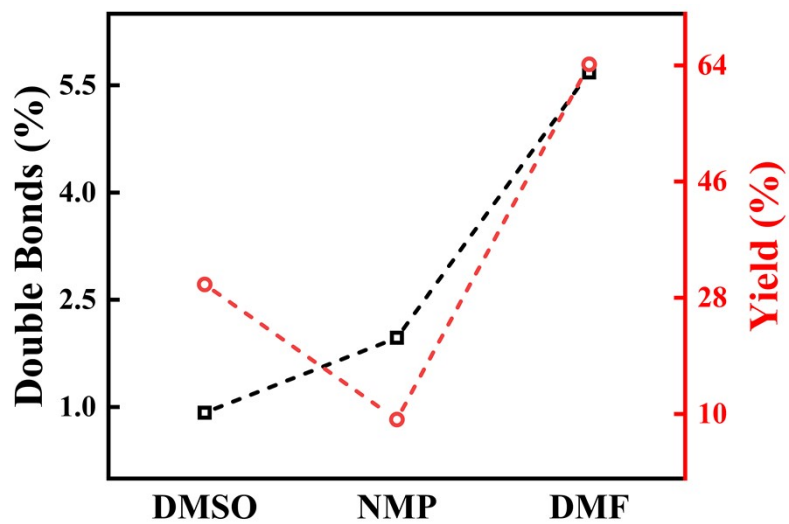

**Fig. S20** Dependence of double bond content and reaction yield on different solvents



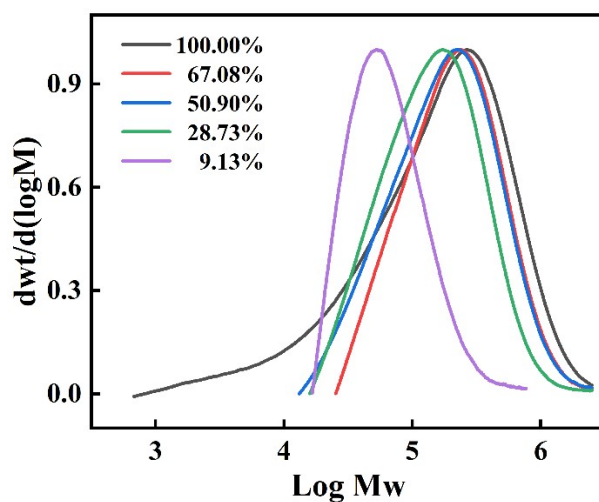

**Fig. S21** Molecular weight distribution of P(VDF-TrFE) and P(VDF-TrFE-DB)s

**Table S3** Molecular weights of P(VDF-TrFE-DB)s with different yields and P(VDF-TrFE)

| Yield (%) | Temperature (°C) | Time (h) | Solvent (mL) | P(VDF-TrFE) (mg) | NaOH (mg) | Mw (g/mol) | Mn (g/mol) | PDI  |
|-----------|------------------|----------|--------------|------------------|-----------|------------|------------|------|
| 100       | /                | /        | /            | /                | /         | 311146     | 75366      | 4.13 |
| 67.08     | 70               | 4        | DMF (5)      | 200              | 50        | 295316     | 152758     | 1.93 |
| 50.90     | 70               | 12       | DMF (5)      | 200              | 100       | 268169     | 119976     | 2.24 |
| 28.73     | 70               | 24       | DMF (5)      | 200              | 100       | 207031     | 102948     | 2.01 |
| 9.13      | 70               | 4        | NMP (5)      | 200              | 100       | 78660      | 52874      | 1.49 |

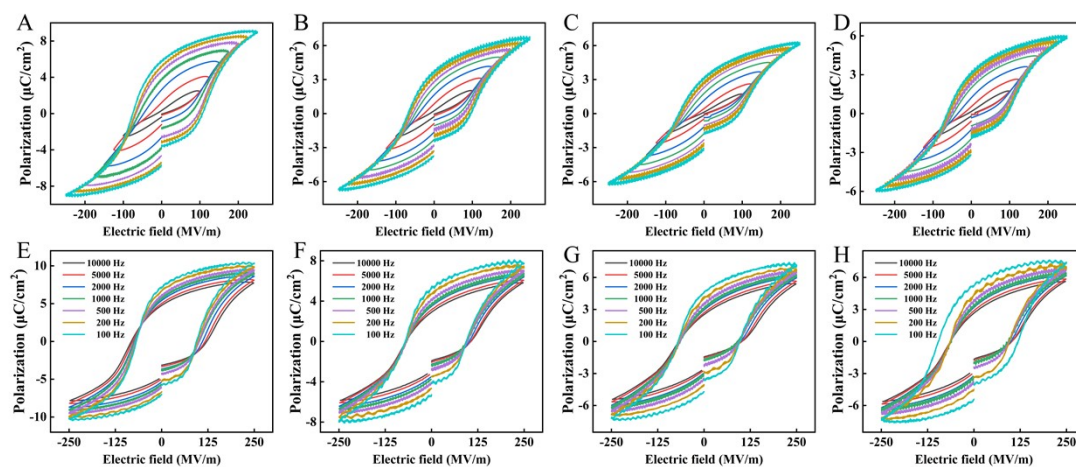

**Fig. S22**  $P$ - $E$  loops of P(VDF-TrFE-DB) films with different double bond contents. (A, B, C, D)  $P$ - $E$  loops of P(VDF-TrFE-DB) films with double bond content of 2.5%, 3.3%, 3.9% and 4.8% at 1000 Hz, respectively; (E, F, G, H)  $P$ - $E$  loops of P(VDF-TrFE-DB) films with double bond content of 2.5%, 3.3%, 3.9% and 4.8% at 250 MV/m, respectively.

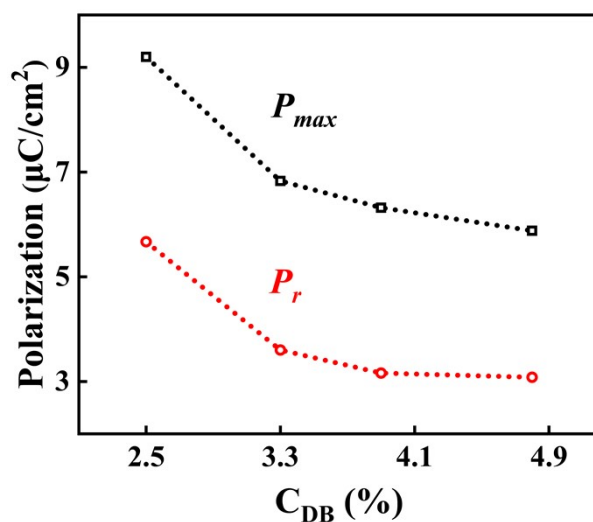

**Fig. S23**  $P_{max}$  and  $P_r$  of P(VDF-TrFE-DB) films with different double bond contents
